# Supplementary material for: Synthesis and application of a novel poly-l-phenylalanine electroactive macromonomer as matrix for the biosensing of ‘Abused Drug’ model
Source: Royal Society of Chemistry journal article supplement (doi:10.1039/c6py01764a), 2016-01-01
Supplement: c6py01764a1.pdf [file c6py01764a1.pdf]

## Supplementary Information

### **Synthesis and Application of a Novel Poly-L-phenylalanine Electroactive Macromonomer as Matrix for the Biosensing of ‘Abused Drug’ Model**

*Tulay Yilmaz<sup>1,2</sup>, Emine Guler<sup>1,2</sup>, Z. Pinar Gumus<sup>2</sup>, Huseyin Akbulut<sup>3</sup>, Ebru Aldemir<sup>2</sup>, Hakan Coskunol<sup>2</sup>, Demet Goen Colak<sup>3</sup>, Ioan Cianga<sup>3,4</sup>, Shuhei Yamada<sup>5</sup>, Suna Timur<sup>1,2\*</sup>, Takeshi Endo<sup>5</sup>, Yusuf Yagci<sup>3\*</sup>*

<sup>1</sup>Ege University, Faculty of Science, Biochemistry Department, 35100 Bornova, Izmir/Turkey.

<sup>2</sup>Ege University, Institute of Drug Abuse Toxicology&Pharmaceutical Sciences, 35100 Bornova, Izmir/Turkey

<sup>3</sup>Istanbul Technical University, Department of Chemistry, Faculty of Science and Letters, Istanbul/Turkey

<sup>4</sup>"Petru Poni" Institute of Macromolecular Chemistry, Iasi, 41A Grigore Ghica Voda Alley, 700487, Romania

<sup>5</sup>Molecular Engineering Institute, Kinki University, 11-6 Kayanomori, Iizuka, Fukuoka, 820-8555, Japan.

## Table of Contents

**Fig. S1.** The  $^1\text{H}$ -NMR spectra in  $\text{CDCl}_3$  of the intermediates used for the initiator synthesis: (A) **EDOT-NO<sub>2</sub>-BTDA, 3** and (B) **EDOT-NH<sub>2</sub>-BTDA, 4** in Scheme 1. P3

**Fig. S2.** IR spectra of initiator **EDOT-NH<sub>2</sub>-BTDA, 4** and of the organic intermediate used for its synthesis P4

**Fig. S3.** IR spectrum of macromonomer **EDOT-BTDA-PPhe** P5

**Fig. S4.** Influence of interferants including BSA (1.0%), 0.5  $\mu\text{M}$  of metamphetamine, 3-acetamidophenol,codeine. (Error bars shows  $\pm$  S.D). P6

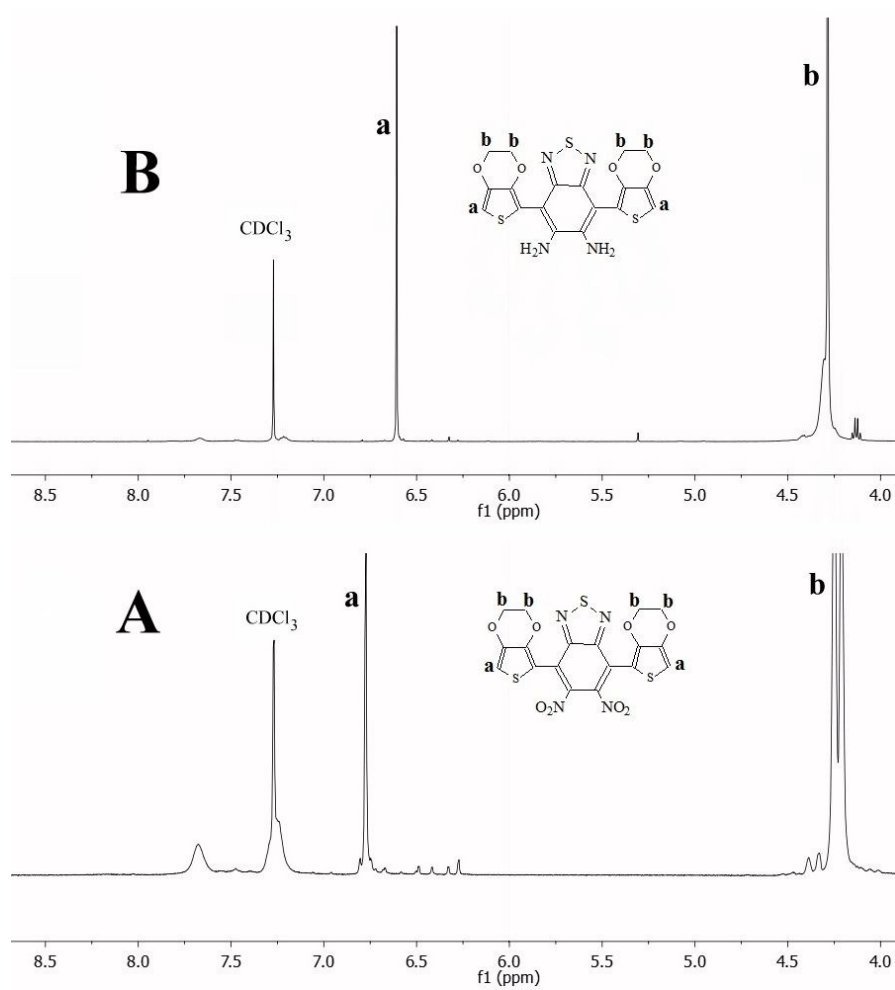

Figure S1. The  $^1\text{H}$ -NMR spectra in  $\text{CDCl}_3$  of the intermediates used for the initiator synthesis: (A) **EDOT-NO<sub>2</sub>-BTDA, 3** and (B) **EDOT-NH<sub>2</sub>-BTDA, 4** in Scheme 1.

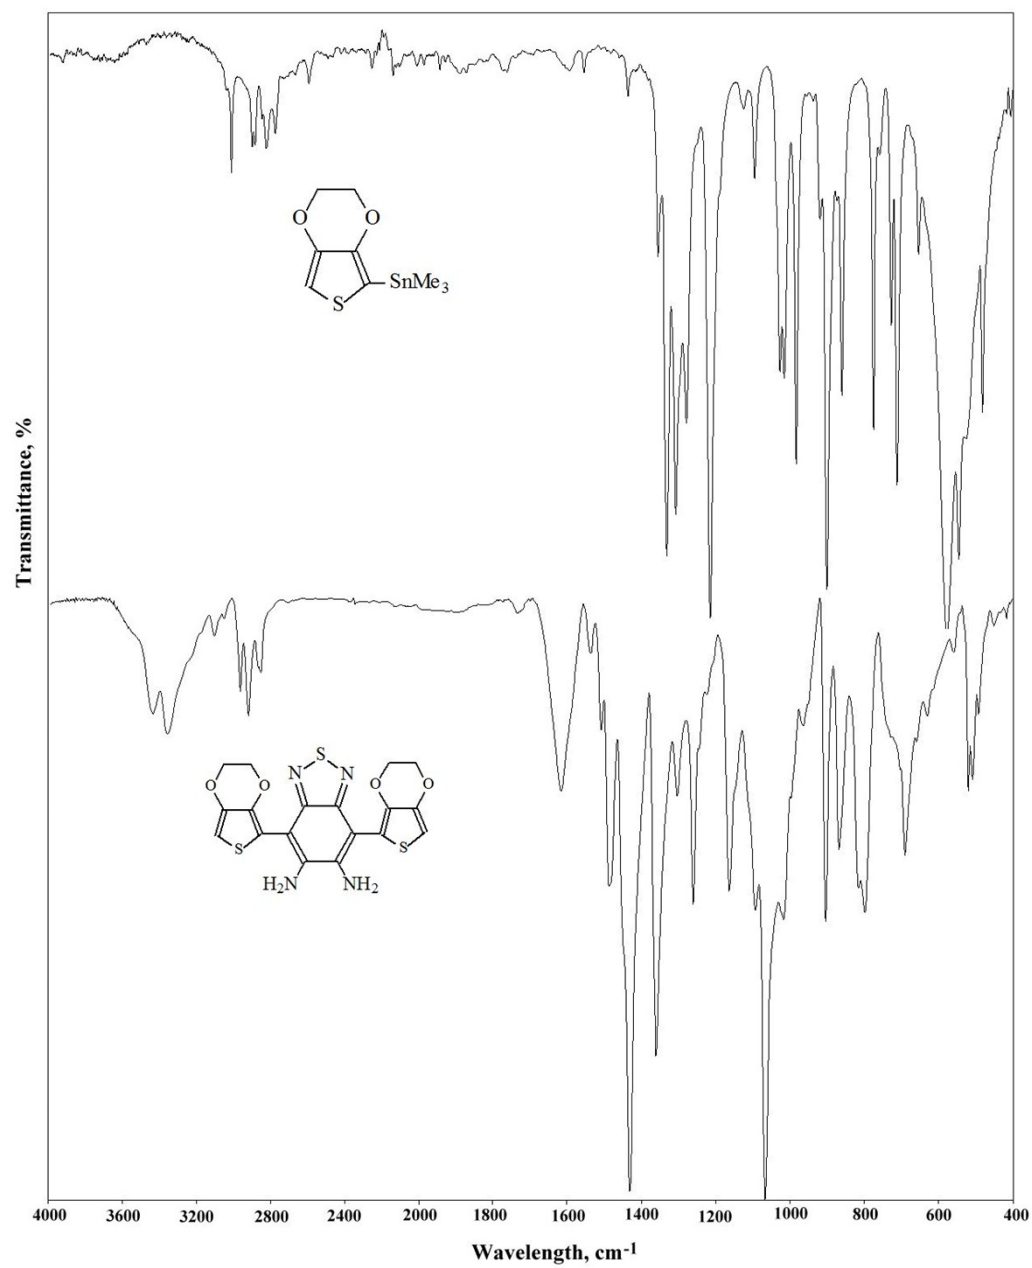

**Fig. S2.** IR spectra of the initiator, **EDOT-NH<sub>2</sub>-BTDA, 4** and of the organic intermediate used for its synthesis

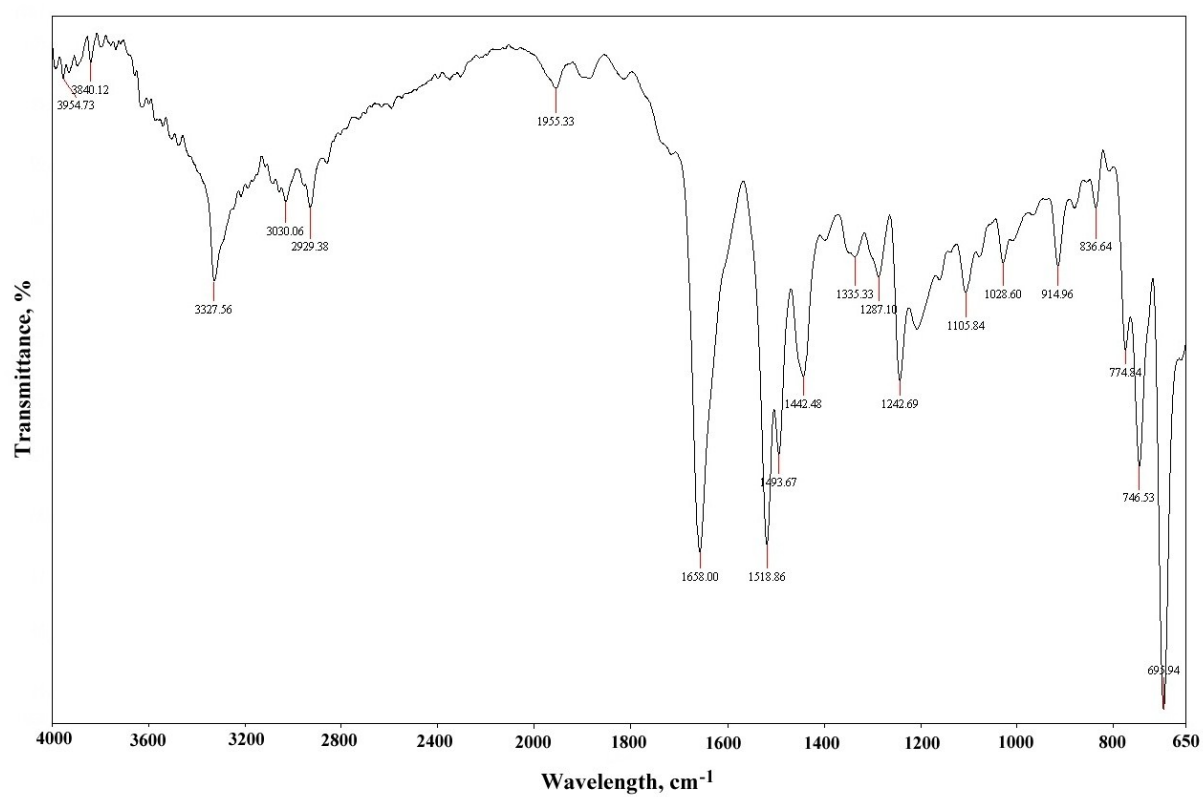

**Fig. S3.** IR spectrum of the macromonomer **EDOT-BTDA-PPhe**

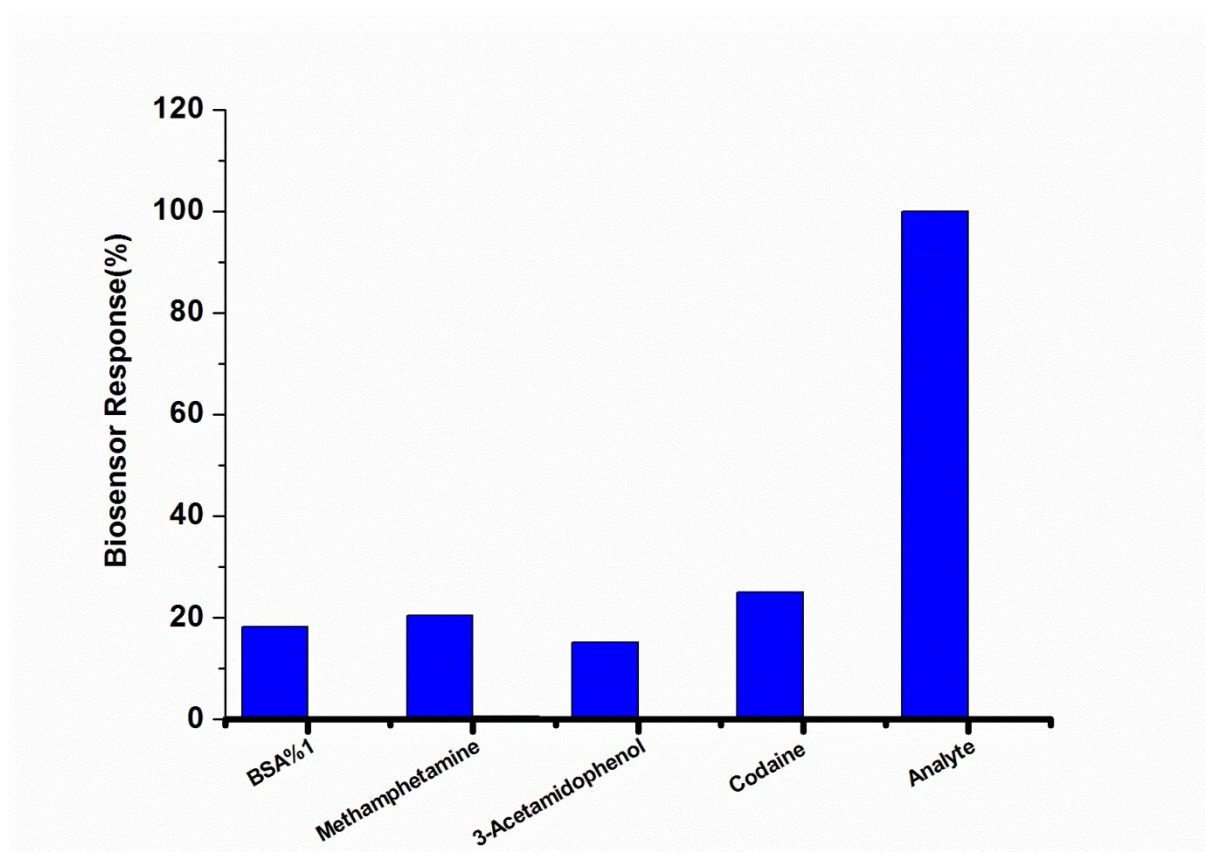

**Fig. S4.** Influence of interferants including BSA (1.0%), 0.5  $\mu$ M of metamphetammine, 3-acetamidophenol, codeine. (Error bars shows  $\pm$  S.D).
